# Supplementary material for: Temporal trends of medical cost and cost-effectiveness in sepsis patients: a Japanese nationwide medical claims database
Source: PubMed Central journal article supplement (PMC9281011; doi:10.1186/s40560-022-00624-5), 2022-07-14
Supplement: 40560_2022_624_MOESM1_ESM.pdf [file 40560_2022_624_MOESM1_ESM.pdf]

## **Temporal trends of medical cost and cost effectiveness in sepsis patients - a Japanese nationwide medical claims database**

**Authors:** Takehiko Oami<sup>1</sup>, Taro Imaeda<sup>1</sup>, Taka-aki Nakada<sup>1</sup>, Toshikazu Abe<sup>2,3</sup>,  
Nozomi Takahashi<sup>1</sup>, Yasuo Yamao<sup>1</sup>, Satoshi Nakagawa<sup>4</sup>, Hiroshi Ogura<sup>5</sup>, Nobuaki  
Shime<sup>6</sup>, Yutaka Umemura<sup>5</sup>, Asako Matsushima<sup>7</sup> and Kiyohide Fushimi<sup>8</sup>

### **Affiliations:**

1. Department of Emergency and Critical Care Medicine, Chiba University Graduate School of Medicine, Chiba, Japan
2. Health Services Research and Development Center, University of Tsukuba, Tsukuba, Japan.
3. Department of Emergency and Critical Care Medicine, Tsukuba Memorial Hospital, Tsukuba, Japan.
4. Department of Critical Care Medicine, National Center for Child Health and Development, Tokyo, Japan
5. Department of Traumatology and Acute Critical Medicine, Osaka University Graduate School of Medicine, Osaka, Japan
6. Department of Emergency and Critical Care Medicine, Graduate School of Biomedical and Health Sciences, Hiroshima University, Hiroshima, Japan
7. Department of Advancing Acute Medicine, Graduate School of Medical Sciences, Nagoya City University, Aichi, Japan
8. Department of Health Policy and Informatics, Tokyo Medical and Dental University Graduate School of Medical and Dental Sciences, Tokyo, Japan.

### **Correspondence:**

Taka-aki Nakada

Chiba University Graduate School of Medicine, Department of Emergency and  
Critical Care Medicine, 1-8-1 Inohana, Chuo, Chiba 260-8677, Japan

Phone: +81-43-226-2372, Fax: +81-43-226-2371,

Email: taka.nakada@nifty.com

## **Additional files**

### **Additional File 1:**

**Table S1.** Diagnostic categories with corresponding ICD-10

**Table S2.** Demographics and clinical characteristics of patients with sepsis in the cohort

**Additional File 2: Figure S1.** Flowchart of study population

**Additional File 3: Figure S2.** Temporal changes in gross medical costs and number of sepsis patients between 2010 and 2017

**Additional File 4: Figure S3.** Annual changes in medical costs and length of hospital stay according to sex

**Additional File 5: Figure S4.** Annual changes in medical costs and length of hospital stay according to age subgroups

**Additional File 6: Figure S5.** Annual changes in medical costs and length of hospital stay according to the site of infection

## **List of abbreviations**

DPC, diagnosis procedure combination; ICU, intensive care unit; OR, odds ratio; CI, confidence interval.

**Table S1** Diagnostic categories with corresponding ICD-10

| Diagnosis                   | ICD-10 codes                                                                                                                                                                          |
|-----------------------------|---------------------------------------------------------------------------------------------------------------------------------------------------------------------------------------|
| Comorbidity                 |                                                                                                                                                                                       |
| Malignant tumor             | C00-C97, D00-D09                                                                                                                                                                      |
| Hypertension                | I10-I15                                                                                                                                                                               |
| Diabetes mellitus           | E10-E14                                                                                                                                                                               |
| Heart failure               | I50                                                                                                                                                                                   |
| Ischemic heart disease      | I60-I69                                                                                                                                                                               |
| Cerebrovascular disease     | I20-I25                                                                                                                                                                               |
| Chronic respiratory disease | J40-J47                                                                                                                                                                               |
| Chronic renal failure       | N18                                                                                                                                                                                   |
| Focus of infection          |                                                                                                                                                                                       |
| Respiratory                 | A15-A16, J00-J06, J09-J18, J20-J22, J31-J32, J35-J37, J39.0, J39.1, J85-J86                                                                                                           |
| Urogenital                  | A18.1, A51.0, A54.0-A54.2, A56.0-A56.2, A59.0, A60.0, N30.0, N30.8, N39.0, N41.0-N41.3, N45, N49.0-N49.2, N70-N77, O23                                                                |
| Abdominal                   | A00-A09, A18.3, A42.1, A74.8, K35-K38, K57.0, K57.2, K57.4, K57.8, K61, K63.0, K63.1, K65, K67, K75.0, K80.0, K80.1, K80.3, K80.4, K81, K83.0                                         |
| Bone and soft tissue        | A18.0, A18.4, A26.0, A28.1, A31.1, A31.8, A32.0, A36.3, A42.2, A43.1, A46, A48.0, L00-L08, M00, M01.0, M46.3, M46.5, M49.1-M49.3, M60.0, M86.0, M86.1, M86.65, M86.66, M86.69, M86.99 |
| Blood                       | A19, A40.0, A49.0, A49.1, A49.9                                                                                                                                                       |
| Organ dysfunction           |                                                                                                                                                                                       |
| Renal                       | N00.9, N10, N17.0, N17.1, N17.8, N17.9                                                                                                                                                |
| Hepatic                     | K72.0, K72.9, K76.8                                                                                                                                                                   |
| Thrombocytopenia            | D69.5, D69.6                                                                                                                                                                          |
| Coagulopathy                | D65, D68.9                                                                                                                                                                            |
| Acidosis                    | E87.2                                                                                                                                                                                 |

**Table S2** Demographics and clinical characteristics of patients with sepsis in the cohort

|                                    | Total          | Year          |               |               |               |                |                |                |                |
|------------------------------------|----------------|---------------|---------------|---------------|---------------|----------------|----------------|----------------|----------------|
|                                    |                | 2010          | 2011          | 2012          | 2013          | 2014           | 2015           | 2016           | 2017           |
| Number of patients                 | 1,276,678      | 67,318        | 100,060       | 126,414       | 141,670       | 181,813        | 197,388        | 228,190        | 233,825        |
| Community-onset sepsis, n (%)      | 739,877 (58.0) | 34,346 (51.0) | 51,693 (51.6) | 65,261 (51.6) | 78,923 (55.7) | 107,781 (59.2) | 119,387 (60.4) | 139,354 (61.0) | 143,132 (61.2) |
| Comorbidity                        |                |               |               |               |               |                |                |                |                |
| Malignant tumor, n (%)             | 417,735 (32.7) | 22,989 (34.1) | 33,734 (33.7) | 44,188 (35.0) | 48,715 (34.4) | 59,489 (32.7)  | 63,630 (32.2)  | 71,333 (31.3)  | 73,657 (31.5)  |
| Hypertension, n (%)                | 323,936 (25.4) | 15,460 (23.0) | 23,929 (23.9) | 29,979 (23.7) | 34,630 (24.4) | 46,254 (25.4)  | 49,522 (25.1)  | 60,911 (26.7)  | 63,251 (27.1)  |
| Diabetes mellitus, n (%)           | 277,203 (21.7) | 14,006 (20.8) | 21,642 (21.6) | 26,714 (21.1) | 30,360 (21.4) | 39,190 (21.6)  | 43,321 (21.9)  | 49,974 (21.9)  | 51,996 (22.2)  |
| Heart failure, n (%)               | 235,929 (18.5) | 12,269 (18.2) | 19,046 (19.0) | 22,658 (17.9) | 25,149 (17.8) | 33,052 (18.2)  | 36,738 (18.6)  | 42,511 (18.6)  | 44,506 (19.0)  |
| Cerebrovascular disease, n (%)     | 175,756 (13.8) | 9,302 (13.8)  | 14,058 (14.0) | 17,128 (13.5) | 19,066 (13.5) | 25,423 (14.0)  | 27,286 (13.8)  | 31,436 (13.8)  | 32,057 (13.7)  |
| Ischemic heart disease, n (%)      | 120,451 (9.4)  | 6,362 (9.5)   | 9,540 (9.5)   | 12,031 (9.5)  | 13,377 (9.4)  | 17,120 (9.4)   | 18,358 (9.3)   | 21,604 (9.5)   | 22,059 (9.4)   |
| Chronic respiratory disease, n (%) | 130,052 (10.2) | 6,710 (10.0)  | 10,172 (10.2) | 12,257 (9.7)  | 14,234 (10.0) | 19,236 (10.6)  | 20,922 (10.6)  | 23,312 (10.2)  | 23,209 (9.9)   |
| Chronic renal failure, n (%)       | 47,991 (3.8)   | 2,874 (4.3)   | 4,140 (4.1)   | 5,190 (4.1)   | 5,491 (3.9)   | 7,300 (4.0)    | 7,444 (3.8)    | 7,863 (3.4)    | 7,689 (3.3)    |
| Site of infection                  |                |               |               |               |               |                |                |                |                |
| Respiratory, n (%)                 | 442,243 (34.6) | 22,636 (33.6) | 34,196 (34.1) | 40,848 (32.3) | 46,054 (32.5) | 61,766 (33.9)  | 66,844 (33.8)  | 83,071 (36.4)  | 86,828 (37.1)  |
| Urogenital, n (%)                  | 82,849 (6.4)   | 3,724 (5.5)   | 5,549 (5.5)   | 6,970 (5.5)   | 8,898 (6.2)   | 13,044 (7.1)   | 14,863 (7.5)   | 15,216 (6.6)   | 14,585 (6.2)   |
| Abdominal, n (%)                   | 174,340 (13.6) | 9,479 (14.0)  | 13,737 (13.7) | 18,593 (14.7) | 21,424 (15.1) | 25,868 (14.2)  | 28,096 (14.2)  | 28,525 (12.5)  | 28,618 (12.2)  |

|                                      |                |               |               |               |               |                |                |                |                |
|--------------------------------------|----------------|---------------|---------------|---------------|---------------|----------------|----------------|----------------|----------------|
| Bone and soft tissue, n (%)          | 45,778 (3.5)   | 2,309 (3.4)   | 3,545 (3.5)   | 4,538 (3.5)   | 4,932 (3.4)   | 6,882 (3.7)    | 7,522 (3.8)    | 8,117 (3.5)    | 7,933 (3.3)    |
| Meninges/brain/spinal cord, n (%)    | 14,658 (1.1)   | 819 (1.2)     | 1,200 (1.1)   | 1,595 (1.2)   | 1,845 (1.3)   | 2,275 (1.2)    | 2,384 (1.2)    | 2,387 (1.0)    | 2,153 (0.9)    |
| Heart, n (%)                         | 8,538 (0.6)    | 526 (0.7)     | 728 (0.7)     | 972 (0.7)     | 1,019 (0.7)   | 1,330 (0.7)    | 1,330 (0.6)    | 1,299 (0.5)    | 1,334 (0.5)    |
| Blood, n (%)                         | 1,281 (0.1)    | 59 (0.08)     | 95 (0.09)     | 129 (0.1)     | 181 (0.1)     | 191 (0.1)      | 187 (0.09)     | 221 (0.09)     | 218 (0.09)     |
| Multiple, n (%)                      | 373,829 (29.2) | 19,972 (29.6) | 29,954 (29.9) | 37,974 (30.0) | 41,394 (29.2) | 51,235 (28.1)  | 54,994 (27.8)  | 67,328 (29.5)  | 70,978 (30.3)  |
| Unknown, n (%)                       | 133,162 (10.4) | 7,794 (11.5)  | 11,056 (11.0) | 14,795 (11.7) | 15,923 (11.2) | 19,222 (10.5)  | 21,168 (10.7)  | 22,026 (9.6)   | 21,178 (9.0)   |
| Length of antibiotic treatment, days |                |               |               |               |               |                |                |                |                |
| Mean (SD)                            | 20.2 (22.9)    | 19.6 (19.8)   | 19.8 (21.3)   | 20.8 (23.9)   | 20.5 (24.0)   | 19.9 (22.1)    | 20.0 (22.6)    | 20.3 (23.0)    | 20.5 (24.0)    |
| Median (IQR)                         | 13 (8-23)      | 13 (8-23)     | 13 (8-23)     | 14 (8-24)     | 13 (8-24)     | 13 (8-23)      | 13 (8-23)      | 13 (8-23)      | 13 (8-23)      |
| Length of hospital stay, days        |                |               |               |               |               |                |                |                |                |
| Mean (SD)                            | 44.9 (92.9)    | 50.4 (70.2)   | 51.7 (106.7)  | 51.1 (109.9)  | 47.3 (93.3)   | 44.3 (86.1)    | 43.0 (72.1)    | 41.2 (96.1)    | 41.2 (99.0)    |
| Median (IQR)                         | 29 (15-54)     | 34 (17-63)    | 33 (17-63)    | 33 (17-61)    | 30 (16-57)    | 28 (15-53)     | 28 (15-52)     | 26 (15-50)     | 26 (14-49)     |
| ICU admission, n (%)                 | 199,766 (15.6) | 9,941 (14.8)  | 14,968 (15.0) | 21,798 (17.2) | 24,111 (17.0) | 29,576 (16.3)  | 30,858 (15.6)  | 34,002 (14.9)  | 34,512 (14.8)  |
| Surgery, n (%)                       | 570,299 (44.7) | 32,346 (48.0) | 47,191 (47.2) | 62,003 (49.0) | 66,991 (47.3) | 80,882 (44.5)  | 85,446 (43.3)  | 95,988 (42.1)  | 99,452 (42.5)  |
| Discharge status <sup>a</sup>        |                |               |               |               |               |                |                |                |                |
| Home                                 | 698,214 (67.9) | 36,604 (72.4) | 55,343 (71.8) | 68,852 (70.5) | 78,325 (70.2) | 100,183 (67.9) | 108,734 (67.3) | 123,722 (65.8) | 126,451 (65.3) |
| Nursing facility                     | 77,225 (7.5)   | 2,051 (4.1)   | 3478 (4.5)    | 4,298 (4.4)   | 5,284 (4.7)   | 12,368 (8.4)   | 13,825 (8.6)   | 17,606 (9.4)   | 18,315 (9.5)   |

|                         |                   |                  |                  |                  |                  |                  |                  |                  |                  |
|-------------------------|-------------------|------------------|------------------|------------------|------------------|------------------|------------------|------------------|------------------|
| Inter-hospital transfer | 245,635<br>(23.9) | 11,086<br>(21.9) | 16,819<br>(21.8) | 22,897<br>(23.4) | 26,260<br>(23.5) | 34,654<br>(23.5) | 38,704<br>(24.0) | 46,511<br>(24.7) | 48,704<br>(25.1) |
| Others                  | 6,765 (0.7)       | 802 (1.6)        | 1,421 (1.8)      | 1,593 (1.6)      | 830 (0.7)        | 395 (0.2)        | 340 (0.2)        | 266 (0.1)        | 255 (0.1)        |

Data are presented as mean (SD) or median (quartile). SD, standard deviation; IQR, Interquartile range.

<sup>a</sup> Only included survivors

## Figure legends

### Figure S1. Flow chart of the study population

### Figure S2. Temporal changes of gross medical costs and number of sepsis patients between 2010 and 2017

The bar plot depicts the relationship between the year of hospital admission on the x-axis and gross medical costs on the y-axis. The line plot depicts another relationship between the admission year and the number of sepsis patients in this cohort on the y-axis.

### Figure S3. Annual changes of the medical costs and length of hospital stay according to the sex

(A) Annual changes in unadjusted medical costs per hospitalization between 2010 and 2017 according to the sex. Male:  $-\$1067/\text{year}$  [95% CI  $-\$1097$  to  $-\$1037$ ],  $p < 0.0001$ . Female:  $-\$1066/\text{year}$  [95% CI  $-\$1102$  to  $-\$1031$ ],  $p < 0.0001$ . The error bars indicate 95% confidence interval. (B) Annual changes in length of hospital stay between 2010 and 2017 according to the sex. Male:  $-1.7$  [95% CI  $-1.8$  to  $-1.5$ ],  $p < 0.0001$ . Female:  $-1.7$  [95% CI  $-1.8$  to  $-1.6$ ],  $p < 0.0001$ . The error bars indicate 95% confidence interval. The coefficient was calculated using a linear regression analysis.

### Figure S4. Annual changes of the medical costs and length of hospital stay according to the age subgroups

(A) Annual changes in unadjusted medical costs per hospitalization between 2010 and 2017 according to the age subgroups. Adults ( $20 \leq \text{age} \leq 64$ ):  $-\$1134/\text{year}$  [95% CI  $-\$1202$  to  $-\$1066$ ],  $p < 0.0001$ . Early elderly ( $65 \leq \text{age} \leq 74$ ):  $-\$1063/\text{year}$  [95% CI  $-\$1120$  to  $-\$1007$ ],  $p < 0.0001$ . Late elderly ( $75 \leq \text{age}$ ):  $-\$886/\text{year}$  [95% CI  $-\$908$  to  $-\$864$ ],  $p < 0.0001$ . (B) Annual changes in length of hospital stay between 2010 and 2017 according to the age subgroups. Adults ( $20 \leq \text{age} \leq 64$ ):  $-1.8$  [95% CI  $-2.1$  to  $-1.5$ ],  $p < 0.0001$ . Early elderly ( $65 \leq \text{age} \leq 74$ ):  $-1.8$  [95% CI  $-1.9$  to  $-1.7$ ],  $p <$

0.0001. Late elderly ( $75 \leq \text{age}$ ):  $-1.5$  [95% CI  $-1.6$  to  $-1.5$ ],  $p < 0.0001$ . The error bars indicate 95% confidence interval. The coefficient was calculated using a linear regression analysis.

**Figure S5. Annual changes of the medical costs and length of hospital stay according to the site of infection**

(A) Annual changes in unadjusted medical costs per hospitalization between 2010 and 2017 according to the site of infection. Heart:  $-\$82/\text{year}$  [95% CI  $-\$495$  to  $+\$331$ ],  $p = 0.69$ . Blood:  $-\$2,331/\text{year}$  [95% CI  $-\$3564$  to  $-\$1099$ ],  $p < 0.0001$ .

Meninges/brain/spinal cord:  $-\$445/\text{year}$  [95% CI  $-\$684$  to  $-\$205$ ],  $p < 0.0001$ .

Unknown:  $-\$1,156/\text{year}$  [95% CI  $-\$1,250$  to  $-\$1,062$ ],  $p < 0.0001$ . Multiple:  $-\$1336/\text{year}$  [95% CI  $-\$1384$  to  $-\$1287$ ],  $p < 0.0001$ . Bone and soft tissue:  $-\$957/\text{year}$  [95% CI  $-\$1072$  to  $-\$842$ ],  $p < 0.0001$ . Abdominal:  $-\$710/\text{year}$  [95% CI  $-\$768$  to  $-\$653$ ],  $p < 0.0001$ . Respiratory:  $-\$865/\text{year}$  [95% CI  $-\$895$  to  $-\$835$ ],  $p < 0.0001$ . Urogenital:  $-\$561/\text{year}$  [95% CI  $-\$621$  to  $-\$502$ ],  $p < 0.0001$ .

(B) Annual changes in length of hospital stay between 2010 and 2017 according to the site of infection. The error bars indicate 95% confidence interval.

Meninges/brain/spinal cord:  $-0.7$  [95% CI  $-1.7$  to  $-0.2$ ],  $p < 0.0001$ . Blood:  $-2.8$  [95% CI  $-4.2$  to  $-1.3$ ],  $p < 0.0001$ . Heart:  $-0.9$  [95% CI  $-1.5$  to  $-0.3$ ],  $p = 0.001$ .

Unknown:  $-1.7$  [95% CI  $-2.0$  to  $-1.5$ ],  $p < 0.0001$ . Bone and soft tissue:  $-1.8$  [95% CI  $-2.5$  to  $-1.2$ ],  $p < 0.0001$ . Multiple:  $-2.0$  [95% CI  $-2.1$  to  $-1.8$ ],  $p < 0.0001$ .

Abdominal:  $-1.2$  [95% CI  $-1.5$  to  $-1.0$ ],  $p < 0.0001$ . Urogenital:  $-1.3$  [95% CI  $-1.7$  to  $-0.9$ ],  $p < 0.0001$ . Respiratory:  $-1.5$  [95% CI  $-1.6$  to  $-1.4$ ],  $p < 0.0001$ . The error bars indicate 95% confidence interval. The coefficient was calculated using a linear regression analysis.
